## Official opening of Charles Darwin House 2

November saw the official opening of Charles Darwin House (CDH) 2, the next phase of the bioscience hub. Nigel Brown, President of the Microbiology Society, opened proceedings and welcomed George Freeman, Minister for Life Sciences who formally opened the building.

Freeman emphasized the importance of collaboration and exploring synergies between societies, exemplified by CDH and CDH 2. He spoke about the significance of links between industry and academic research as well as between life and health sciences, in particular in underpinning the UK's position as a science superpower.

It was a great occasion to celebrate and look forward to further opportunities to work together in the future. ■

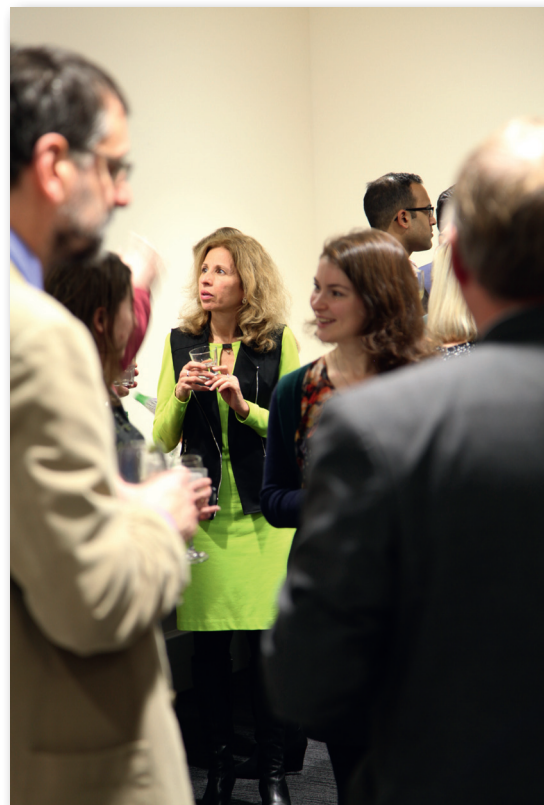

Staff and guests at Charles Darwin House 2 official opening reception *Photo: Richard English*

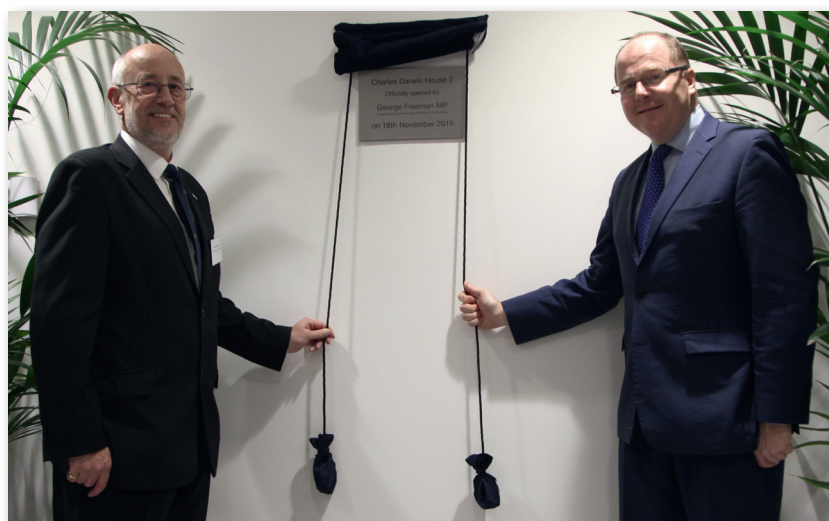

Unveiling the official plaque – From left to right: Nigel Brown (President, Microbiology Society) and George Freeman MP (UK Minister for Life Sciences) *Photo: Richard English*

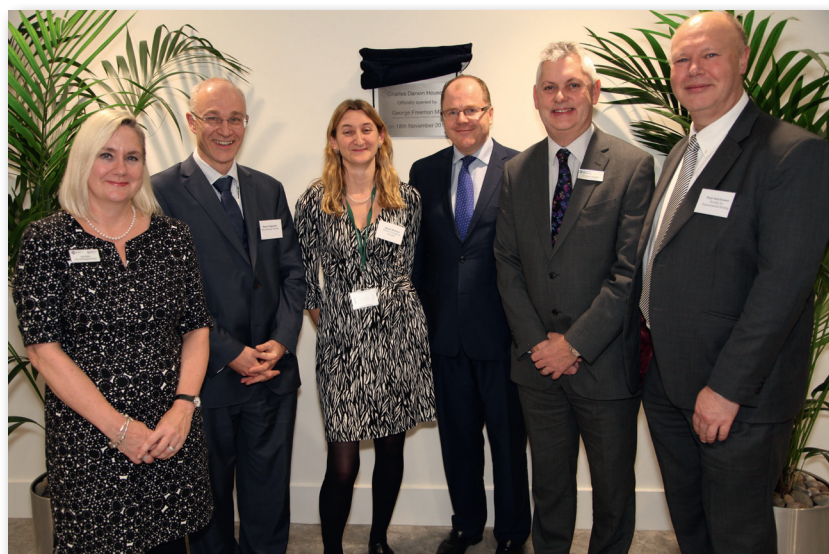

From left to right: Kate Baillie (CEO Biochemical Society), Peter Cotgreave (CEO Microbiology Society), Hazel Norman (Executive Director British Ecological Society), George Freeman MP (UK Minister for Life Sciences), Mark Downs (CEO Royal Society of Biology), Paul Hutchinson (CEO Society for Experimental Biology) *Photo: Richard English*
